# Supplementary material for: Effect of pupil dilation on biometric measurements and intraocular lens power calculations in schoolchildren
Source: PLoS One. 2018 Sep 13;13(9):e0203677. doi: 10.1371/journal.pone.0203677 (PMC6136745; doi:10.1371/journal.pone.0203677)
Supplement: S1 File — (XLSX) [file pone.0203677.s001.xlsx]

## Sheet: 散瞳前后
	散瞳前																																					散瞳后
case number	AL	CCT	AD	ACD	LT	ASL	LCP	RLP	RT	K1	K2	Astig D	Astig Axis	WTW	Icx	Icy	I distance	PD	PCx	Pcy	P distance	Hill RBF	预留	Barret	预留	Hagis		HofferQ		Holladay		Olsen		SRKII		SRKT		AL	CCT	AD	ACD	LT	ASL	LCP	RLP	RT	K1	K2	Astig D
1	23.69	526	3.16	3.69	3.58	7.27	5.48	0.231321	200	44.56	45.35	0.79	98	11.82	-0.3	0.09	0.313209	6.09	-0.21	0	0.21	19	-0.12	18.5	0.11	18.5	0.04	18.5	-0.11	18.5	0.04	18.5	-0.12	19	0.09	19	-0.14	23.74	551	3.21	3.76	3.53	7.29	5.525	0.23273	200	44.55	45.57	1.01
2	22.73	525	3.13	3.66	3.61	7.27	5.465	0.240431	200	44.41	45.51	1.1	100	11.89	0.2	-0.04	0.203961	5.54	0.27	0.06	0.276586	22.5	-0.21	22	0.06	22	-0.12	22	-0.12	22	-0.12	22	-0.11	21.5	0.02	22	-0.09	22.76	550	3.17	3.72	3.59	7.31	5.515	0.242311	200	44.38	45.72	1.34
3	24.18	543	3.19	3.74	3.3	7.04	5.39	0.222911	200	44.07	44.65	0.57	67	11.57	-0.31	0.05	0.314006	6.82	-0.28	-0.03	0.281603	18	-0.05	17.5	0.11	18	-0.13	17.5	-0.03	17.5	0.15	17.5	-0.08	18.5	-0.06	18	-0.03	24.2	572	3.18	3.75	3.32	7.07	5.41	0.223554	200	43.69	45.17	1.49
4	23.18	544	3.09	3.63	3.34	6.97	5.3	0.228645	200	43.69	44.43	0.74	88	11.52	0.46	-0.04	0.461736	4.9	0.16	0	0.16	22	-0.21	21.5	-0.1	21.5	0.01	21.5	-0.09	21.5	-0.1	21	0.11	21	0.17	21.5	-0.1	23.25	576	3.08	3.66	3.36	7.02	5.34	0.229677	200	43.63	44.8	1.17
5	22.01	552	2.77	3.32	3.71	7.03	5.175	0.23512	200	43.52	44.24	0.72	92	12.41	-0.4	0.95	1.03078	5.55	-0.27	-0.05	0.274591	26	-0.04	25.5	-0.06	25.5	0.18	26	-0.04	25.5	0.13	25.5	0.04	24.5	-0.17	25.5	-0.06	22.02	570	3.02	3.59	3.45	7.04	5.315	0.241371	200	43.45	43.99	0.54
6	20.76	552	2.66	3.21	3.81	7.02	5.115	0.246387	200	42.34	43.93	1.58	83	12.64	-0.03	1.03	1.03044	5.39	0.26	-0.14	0.295296	32	-0.19	32	-0.18	31.5	-0.08	32	0	31.5	-0.09	31.5	0.16	30	0.07	30.5	0.15	20.81	574	3	3.57	3.48	7.05	5.31	0.255166	200	42.48	44.86	2.38
7	23.62	619	3.35	3.97	3.29	7.26	5.615	0.237722	200	43.47	44.38	0.91	79	11.52	-0.03	-0.2	0.202237	5.47	-0.13	-0.18	0.222036	20.5	-0.11	20	0.14	20.5	-0.12	20	0	20	0.05	20.5	-0.15	20	0.19	20	0.08	23.58	631	3.36	3.99	3.27	7.26	5.625	0.23855	200	43.43	44.32	0.89
8	23.49	636	3.29	3.92	3.29	7.21	5.565	0.236909	200	43.71	44.85	1.15	89	11.47	-0.02	-0.13	0.131529	5.32	-0.21	-0.15	0.25807	20.5	-0.12	20	0.12	20	0.17	20	-0.03	20	0.03	20	0.12	20	0.18	20	0.09	23.5	643	3.32	3.96	3.25	7.21	5.585	0.23766	200	43.7	44.87	1.17
9	22.96	530	3.36	3.89	3.45	7.34	5.615	0.244556	200	44.23	45.18	0.95	72	11.81	-0.43	-0.04	0.431856	5.39	-0.03	0.09	0.0948683	22	-0.24	21.5	0.08	21.5	-0.04	21.5	-0.14	21.5	-0.12	21.5	0.07	21	0.14	21.5	-0.08	22.97	546	3.36	3.91	3.45	7.36	5.635	0.24532	200	44.12	45.05	0.93
10	23.17	529	3.38	3.91	3.46	7.37	5.64	0.243418	200	43.96	45.52	1.55	110	12.05	0.47	0.16	0.496488	5.04	-0.02	0.11	0.111803	21	-0.08	21	-0.08	20.5	0.15	20.5	0	20.5	0.06	21	-0.13	20.5	0.11	20.5	0.12	23.21	551	3.4	3.95	3.46	7.41	5.68	0.244722	200	43.97	45.17	1.19
11	22.53	544	3.28	3.83	3.55	7.38	5.605	0.248779	200	46.67	48.08	1.41	85	11.85	-0.25	0.43	0.497393	5.09	-0.02	0.24	0.240832	20.5	-0.32	20	0.02	19.5	-0.17	19.5	-0.1	19.5	0.05	19.5	-0.01	20	-0.12	20	0.02	22.51	551	3.33	3.88	3.48	7.36	5.62	0.249667	200	46.69	47.53	0.85
12	22.39	543	3.26	3.8	3.54	7.34	5.57	0.248772	200	46.84	48.48	1.64	79	11.83	0.39	0.54	0.666108	4.86	0.14	0.1	0.172047	20.5	-0.25	19.5	-0.06	19.5	-0.1	19.5	0.01	19.5	0.15	19.5	0.06	20	-0.04	20	0.14	22.39	551	3.29	3.84	3.48	7.32	5.58	0.249218	200	46.8	48.16	1.36
13	24.84	555	3.15	3.7	3.32	7.02	5.36	0.215781	200	43.22	44.25	1.03	81	11.42	-0.09	0.03	0.0948683	3.75	0.22	-0.04	0.223607	17	-0.31	16.5	-0.16	16.5	0.07	16	0.1	16.5	-0.01	16	0.05	17	-0.14	16.5	-0.01	24.88	571	3.16	3.73	3.29	7.02	5.375	0.216037	200	43.13	44.36	1.22
14	24.93	556	3.1	3.66	3.3	6.96	5.31	0.212996	200	43.07	44.51	1.45	88	11.39	0.08	0.01	0.0806226	3.57	-0.16	-0.06	0.17088	16.5	-0.21	16	-0.06	16.5	-0.16	16	-0.13	16	0.1	15.5	0.12	16.5	0.06	16	0.1	24.94	572	3.12	3.69	3.28	6.97	5.33	0.213713	200	43.1	44.71	1.61
15	25.25	527	3.35	3.88	3.37	7.25	5.565	0.220396	200	41.34	41.81	0.47	91	12.35	-0.19	0.06	0.199249	3.57	-0.1	0.02	0.10198	18.5	-0.26	18	0.01	18.5	0	18	-0.05	18	-0.02	18	0.02	18	-0.19	17.5	0.11	25.26	542	3.4	3.94	3.33	7.27	5.605	0.221892	200	41.16	41.93	0.77
16	25.28	529	3.39	3.92	3.37	7.29	5.605	0.221717	200	41.5	42.02	0.52	88	12.33	0.07	0.08	0.106301	3.41	0.07	0	0.07	18	-0.14	17.5	0.14	18	0.11	17.5	0.05	17.5	0.11	17.5	0.16	17.5	0.02	17.5	-0.1	25.29	554	3.42	3.98	3.35	7.33	5.655	0.223606	200	41.35	42.18	0.83
17	24.59	545	3.4	3.95	3.25	7.2	5.575	0.226718	200	43.36	44.01	0.65	81	11.64	-0.28	0.12	0.304631	4.22	-0.07	-0.03	0.0761577	17.5	-0.01	17.5	-0.17	17.5	0.02	17	0.03	17.5	-0.13	17	0.16	17.5	0.01	17.5	-0.1	24.56	547	3.5	4.05	3.18	7.23	5.64	0.229642	200	43.27	43.92	0.64
18	24.45	552	3.44	3.99	3.21	7.2	5.595	0.228834	200	43.63	44.36	0.73	105	11.91	0.31	0.05	0.314006	3.97	-0.17	-0.06	0.180278	18	-0.29	17.5	-0.09	17.5	0.04	17	0.06	17.5	-0.09	17.5	-0.13	18	0.08	17.5	-0.02	24.46	558	3.53	4.09	3.19	7.28	5.685	0.23242	200	43.38	44.36	0.97
19	24.9	487	3.63	4.12	3.16	7.28	5.7	0.228916	200	42.41	42.48	0.07	6	12.4	-0.32	-0.05	0.323883	4.12	0.07	0.06	0.0921954	18.5	-0.26	18	0	18.5	-0.09	18	-0.15	18	-0.06	18	0.09	18	-0.13	17.5	0.16	24.94	508	3.66	4.17	3.14	7.31	5.74	0.230152	200	42.48	42.72	0.25
20	24.88	503	3.61	4.11	3.14	7.25	5.68	0.228296	200	42.38	43.23	0.86	98	12.27	0.51	-0.26	0.572451	4.58	-0.02	-0.04	0.0447214	18	-0.18	17.5	0.07	18	-0.05	17.5	-0.09	17.5	0.03	17.5	0.13	17.5	0.07	17.5	-0.06	24.89	512	3.65	4.16	3.1	7.26	5.71	0.229409	200	42.3	42.96	0.65
21	24.25	564	3.08	3.65	3.35	7	5.325	0.219588	200	41.12	42.32	1.2	91	12.35	-0.58	-0.29	0.64846	4.49	-0.55	-0.36	0.657343	21	-0.04	20.5	0.15	21.5	-0.17	21	-0.09	20.5	0.16	20.5	0.1	20.5	0.1	20.5	0.04	24.24	579	3.26	3.84	3.19	7.03	5.435	0.224216	200	40.96	42.73	1.78
22	25.44	564	3.25	3.82	3.21	7.03	5.425	0.213247	200	40.86	42.52	1.66	92	12.3	0.38	-0.03	0.381182	4.28	0.21	-0.26	0.334215	17.5	-0.07	17	0.17	18	-0.14	17	0.15	17.5	-0.16	17	0.11	17	0.16	17	-0.01	25.45	581	3.33	3.91	3.14	7.05	5.48	0.215324	200	40.84	42.58	1.74
23	24.48	496	3.19	3.68	3.31	6.99	5.335	0.217933	200	45.14	45.24	0.09	60	11.85	-0.25	0.17	0.302324	3.63	-0.11	0.34	0.357351	16	-0.12	15.5	0.07	15.5	0.11	15.5	-0.15	15.5	0.16	15	0.14	17	-0.05	16	0.02	24.48	503	3.22	3.72	3.31	7.03	5.375	0.219567	200	44.96	45.15	0.18
24	24.47	493	3.23	3.73	3.32	7.05	5.39	0.22027	200	44.81	45.61	0.8	117	11.82	0.34	0.36	0.495177	3.41	-0.04	0.17	0.174642	16	-0.11	15.5	0.09	15.5	0.12	15.5	-0.14	16	-0.16	15.5	-0.16	17	-0.04	16	0.04	24.49	502	3.24	3.74	3.31	7.05	5.395	0.220294	200	44.6	45.52	0.93
25	24.75	530	3.18	3.71	3.33	7.04	5.375	0.217172	200	42.1	43.74	1.64	88	12.06	-0.19	0.03	0.192354	3.77	0	-0.04	0.04	18	-0.05	17.5	0.14	18	0.06	17.5	0.09	18	-0.13	17.5	0.02	18	-0.14	17.5	0.14	24.75	540	3.21	3.75	3.3	7.05	5.4	0.218182	200	42.02	43.41	1.38
26	24.78	534	3.17	3.71	3.33	7.04	5.375	0.216909	200	41.87	43.92	2.05	81	12.16	0.27	0.03	0.271662	3.17	-0.1	0.05	0.111803	18	-0.09	17.5	0.11	18	0.03	17.5	0.06	18	-0.16	17.5	-0.02	18	-0.18	17.5	0.11	24.79	540	3.21	3.75	3.3	7.05	5.4	0.21783	200	42.06	43.74	1.68
27	24.34	505	3.16	3.67	3.45	7.12	5.395	0.221652	200	42.91	45.37	2.45	93	11.64	-0.35	0.05	0.353553	3.18	-0.11	-0.04	0.117047	18	-0.22	17.5	-0.06	17.5	0.09	17.5	-0.15	17.5	0.03	17	0.13	18.5	-0.2	17.5	0.12	24.35	518	3.16	3.68	3.41	7.09	5.385	0.22115	200	42.77	44.72	1.95
28	24.66	502	3.17	3.67	3.4	7.07	5.37	0.217762	200	43	44.45	1.45	82	11.75	0.25	-0.07	0.259615	2.94	-0.13	0.07	0.147648	17.5	-0.22	17	-0.05	17	0.14	17	-0.14	17	0.05	16.5	0.14	17.5	-0.14	17	0.07	24.69	521	3.18	3.7	3.39	7.09	5.395	0.21851	200	43.08	44.97	1.88
29	23.36	588	3.25	3.84	3.44	7.28	5.56	0.238014	200	42.5	44.13	1.63	87	11.92	-0.34	-0.3	0.453431	3.81	-0.13	-0.05	0.139284	22	-0.05	22	-0.15	22	-0.01	21.5	0.14	21.5	0.09	22	-0.05	21.5	-0.06	21.5	0.04	23.41	606	3.34	3.94	3.38	7.32	5.63	0.240496	200	42.72	44.01	1.29
30	23.69	583	3.26	3.84	3.47	7.31	5.575	0.235331	200	42.19	43.55	1.36	92	11.89	0.19	-0.17	0.254951	3.49	-0.03	-0.14	0.143178	21.5	-0.07	21	0.16	21.5	0.01	21	0.12	21	0.07	21.5	-0.08	21	0	21	0.01	23.72	606	3.36	3.97	3.37	7.34	5.655	0.238406	200	42.28	43.72	1.44
31	21.35	503	2.91	3.42	3.33	6.75	5.085	0.238173	200	45.77	47.73	1.95	83	11.22	-0.26	0.11	0.282312	3.61	-0.14	0.1	0.172047	25.5	-0.24	25	-0.14	24.5	-0.06	25	0.03	25	-0.1	24.5	-0.13	24.5	-0.1	25	-0.05	21.37	525	3.02	3.55	3.28	6.83	5.19	0.242864	200	45.57	47.72	2.14
32	20.04	501	2.87	3.37	3.35	6.72	5.045	0.251747	200	45.66	48.05	2.4	91	11.26	0.49	0.06	0.49366	3.38	0.25	0.15	0.291548	30.5	-0.17	30.5	0.11	29.5	0.07	31	0.02	30.5	-0.16	30	0.09	28.5	0.04	30	0.03	20.06	515	2.96	3.47	3.31	6.78	5.125	0.255484	200	45.51	47.85	2.35
33	23.39	507	2.89	3.39	3.4	6.79	5.09	0.217614	200	44.37	45.47	1.1	88	11.49	-0.44	-0.12	0.45607	3.36	-0.1	-0.12	0.156205	20	-0.11	19.5	0	19.5	0.03	19.5	-0.03	19.5	0.07	19	-0.08	20	-0.07	20	-0.15	23.41	529	2.93	3.46	3.4	6.86	5.16	0.220419	200	44.41	45.74	1.33
34	23.34	509	2.89	3.4	3.42	6.82	5.11	0.218937	200	44.12	45.27	1.15	99	11.66	0.73	-0.15	0.745252	2.89	0.25	-0.22	0.333017	20.5	-0.13	20	-0.01	20	0.02	20	-0.04	20	0.04	19.5	-0.07	20	0.19	20	0.12	23.34	526	2.97	3.5	3.4	6.9	5.2	0.222793	200	44.26	45.38	1.12
35	26.64	570	3.16	3.74	3.41	7.15	5.445	0.204392	200	41.96	42.79	0.83	97	11.61	-0.05	-0.05	0.0707107	4.58	-0.01	0.12	0.120416	13	-0.1	13	-0.06	13.5	-0.1	12.5	0.09	12.5	-0.01	13	-0.15	13.5	0.06	13	-0.17	26.65	580	3.17	3.75	3.41	7.16	5.455	0.20469	200	41.84	42.59	0.75
36	26.83	575	3.14	3.72	3.45	7.17	5.445	0.202944	200	42.02	42.35	0.33	41	11.57	0.05	-0.1	0.111803	3.91	-0.07	-0.02	0.0728011	13	-0.28	12.5	0.11	13	0.08	12.5	-0.07	12	0.12	12.5	0.04	13.5	-0.23	12.5	-0.02	26.84	582	3.15	3.73	3.44	7.17	5.45	0.203055	200	41.82	42.14	0.33
37	24.52	570	3.22	3.79	3.27	7.06	5.425	0.221248	200	43.56	44.51	0.96	91	11.67	-0.15	0.43	0.455412	3.61	0.23	0.17	0.286007	17.5	-0.2	17	-0.02	17	0.14	17	-0.15	17	0.05	17	-0.17	17.5	-0.11	17	0.12	24.56	587	3.23	3.81	3.27	7.08	5.445	0.221702	200	43.39	44.32	0.93
38	23.34	566	3.11	3.68	3.3	6.98	5.33	0.228363	200	43.82	44.62	0.79	94	11.69	0.02	0.29	0.290689	3.11	-0.46	0.17	0.490408	21	-0.05	20.5	0.11	21	-0.17	20.5	0.05	20.5	0.08	20.5	-0.07	20.5	0.13	20.5	0.11	23.34	588	3.18	3.77	3.29	7.06	5.415	0.232005	200	43.65	44.21	0.56
39	27.22	528	3.68	4.21	3.32	7.53	5.87	0.21565	200	41.76	43.92	2.16	87	12.77	-0.39	0.36	0.530754	3.92	-0.05	0.16	0.167631	11	-0.22	11	-0.08	11	0.12	10.5	-0.13	10	0.1	11	0.01	11.5	0.2	10.5	0.07	27.23	548	3.69	4.24	3.32	7.56	5.9	0.216673	200	41.69	43.78	2.09
40	27.06	533	3.66	4.19	3.31	7.5	5.845	0.216001	200	42.02	44.09	2.07	97	12.6	0.2	0.27	0.336006	3.51	0.12	0.09	0.15	11	-0.12	11	0.03	11.5	-0.13	10.5	-0.03	10.5	-0.09	11	0.09	12	-0.07	11	-0.13	27.06	551	3.68	4.23	3.3	7.53	5.88	0.217295	200	42.02	43.84	1.82
41	23.09	546	3.2	3.74	3.45	7.19	5.465	0.236683	200	44.65	45.48	0.83	95	11.81	-0.34	0.01	0.340147	3.53	-0.08	0.09	0.120416	21	-0.14	20.5	0.1	20.5	-0.03	20.5	-0.11	20.5	-0.04	20.5	-0.1	20.5	0.02	20.5	0.05	23.1	558	3.27	3.83	3.39	7.22	5.525	0.239177	200	44.67	45.87	1.2
42	22.68	545	3.11	3.66	3.53	7.19	5.425	0.239198	200	45.01	46.45	1.44	90	11.95	0.27	0.18	0.3245	3.31	0.03	0.03	0.0424264	21.5	-0.01	21.5	-0.1	21	-0.03	21	-0.01	21	0.05	21	-0.06	21	-0.03	21	0.16	22.69	551	3.18	3.73	3.47	7.2	5.465	0.240855	200	44.81	46.11	1.3
43	27.93	500	3.19	3.69	3.35	7.04	5.365	0.192087	200	44.17	45.75	1.58	87	12.25	-0.06	0.3	0.305941	4.38	0.2	0.23	0.304795	6	-0.09	6	12.9	6	-0.02	5	-0.05	5	0.07	6	-0.05	8	0.02	6	-0.1	27.93	509	3.25	3.76	3.33	7.09	5.425	0.194236	200	44.01	45.69	1.69
44	27.68	507	3.18	3.69	3.35	7.04	5.365	0.193822	200	44.04	45.52	1.48	94	12.15	-0.04	0.37	0.372156	3.88	-0.45	0.18	0.484665	7	-0.19	7	-0.14	7	-0.06	6	-0.05	6	0.05	7	-0.16	9	-0.19	7	-0.13	27.69	513	3.23	3.74	3.34	7.08	5.41	0.195377	200	43.91	45.56	1.66
45	23.53	562	3.39	3.95	3.37	7.32	5.635	0.239482	200	45.64	46.04	0.41	89	11.78	-0.13	0.07	0.147648	3.56	0.15	0.17	0.226716	18.5	-0.12	18	0.13	18	-0.05	17.5	0.11	18	-0.01	18	-0.04	18.5	0.18	18.5	-0.1	23.53	578	3.41	3.98	3.37	7.35	5.665	0.240756	200	45.51	46.02	0.51
46	23.68	569	3.32	3.89	3.37	7.26	5.575	0.235431	200	45.28	46.2	0.92	88	12.04	0.34	-0.05	0.343657	3.13	-0.09	0.21	0.228473	18	-0.07	17.5	0.17	17.5	0.01	17.5	-0.16	17.5	0.06	17.5	-0.05	18.5	-0.06	18	-0.02	23.7	583	3.33	3.91	3.37	7.28	5.595	0.236076	200	45.31	46.49	1.18
47	24.39	550	3.29	3.84	3.27	7.11	5.475	0.224477	200	43.37	44.39	1.01	78	12.32	-0.12	0.29	0.313847	3.72	-0.22	0.13	0.255539	18	-0.11	17.5	0.13	18	-0.11	17.5	-0.05	17.5	0.11	17.5	-0.02	18.5	-0.14	18	-0.16	24.4	558	3.3	3.85	3.26	7.11	5.48	0.22459	200	43.36	44.5	1.14
48	24.73	539	3.41	3.95	3.27	7.22	5.585	0.225839	200	43.38	44.64	1.26	102	12.19	0.12	0.05	0.13	3.13	0.02	0.16	0.161245	17	-0.28	16.5	-0.04	16.5	0.08	16	0.08	16.5	-0.02	16.5	-0.11	17	-0.11	16.5	0.02	24.76	545	3.44	3.98	3.23	7.21	5.595	0.225969	200	43.21	44.48	1.27
49	24	588	2.99	3.58	3.47	7.05	5.315	0.221458	200	41.66	43.66	2	95	11.28	-0.43	-0.04	0.431856	3.87	-0.28	0.02	0.280713	21	-0.27	20	0.16	20.5	0.17	20.5	-0.05	20.5	-0.08	20	0.13	20.5	-0.07	20.5	-0.13	24.01	599	3.03	3.63	3.45	7.08	5.355	0.223032	200	41.78	43.98	2.2
50	24.19	593	2.96	3.55	3.48	7.03	5.29	0.218685	200	41.72	44.15	2.43	81	11.26	0.64	-0.03	0.640703	3.19	0.11	0	0.11	20	-0.22	19.5	-0.14	20	-0.15	19.5	-0.03	19.5	0	19	0.14	19.5	0.18	19.5	0	24.2	601	3	3.61	3.47	7.08	5.345	0.220868	200	41.93	43.97	2.04
51	25.29	552	3.18	3.73	3.48	7.21	5.47	0.216291	200	41.15	41.78	0.63	87	12.4	-0.95	-0.61	1.12898	3.66	-0.45	-0.57	0.726223	18.5	-0.27	18	0	18.5	0.01	18	-0.02	18	0	18	-0.06	18	-0.19	17.5	0.11	25.27	568	3.19	3.76	3.46	7.22	5.49	0.217254	200	40.97	42.04	1.07
52	25.14	551	3.09	3.64	3.49	7.13	5.385	0.2142	200	41.07	41.82	0.74	94	12.54	0.16	0.06	0.17088	3.54	0.01	-0.12	0.120416	19	-0.3	18.5	-0.04	19	-0.03	18.5	-0.03	18.5	-0.03	18.5	-0.16	18	0.13	18	0.09	25.16	569	3.11	3.68	3.48	7.16	5.42	0.215421	200	40.81	42.13	1.32
53	25.15	529	3.09	3.61	3.8	7.41	5.51	0.219085	200	43.01	44.24	1.23	89	12.77	0.14	0.19	0.236008	3.35	0	0.02	0.02	16	-0.19	15.5	0.14	16	-0.11	15.5	-0.09	15.5	0.15	15.5	-0.05	16	0.15	15.5	0.11	25.21	544	3.14	3.69	3.71	7.4	5.545	0.219952	200	43.01	44.41	1.4
54	26.88	531	3.03	3.56	3.87	7.43	5.495	0.204427	200	42.65	45.29	2.64	89	13.08	0.26	0.01	0.260192	3.28	0.17	-0.28	0.327567	10	-0.06	10	0.14	10.5	-0.1	9.5	0.05	9.5	0.1	10	0.03	11.5	0.06	10	0.09	26.87	546	3.14	3.69	3.77	7.46	5.575	0.20748	200	42.6	45.17	2.57
55	25.72	561	3.14	3.7	3.24	6.94	5.32	0.206843	200	41.59	41.86	0.27	78	11.8	-0.17	0.37	0.407185	3.95	0.02	0.1	0.10198	16.5	-0.01	16.5	-0.13	17	-0.08	16.5	-0.13	16.5	-0.17	16	0.1	16.5	-0.04	16	0.08	25.74	577	3.19	3.77	3.22	6.99	5.38	0.209013	200	41.45	41.71	0.26
56	25.55	556	3.12	3.68	3.23	6.91	5.295	0.207241	200	41.81	42.42	0.61	107	11.75	0.21	0.25	0.326497	3.82	0	-0.06	0.06	16.5	-0.01	16.5	-0.16	17	-0.12	16.5	-0.15	16.5	-0.1	16	0.06	16.5	0.03	16	0.12	25.56	570	3.16	3.73	3.23	6.96	5.345	0.209116	200	41.82	42.62	0.8
57	23.6	516	3.22	3.73	3.62	7.35	5.54	0.234746	200	41.92	43.3	1.38	94	12.06	-0.16	-0.24	0.288444	3.32	-0.06	-0.11	0.1253	22.5	-0.34	22	-0.13	22	0.1	22	-0.12	21.5	0.14	22	-0.01	21.5	-0.03	21.5	0.05	23.63	528	3.32	3.85	3.49	7.34	5.595	0.236775	200	42.04	43.54	1.5
58	22.19	530	3.15	3.68	3.66	7.34	5.51	0.24831	200	41.58	42.93	1.35	84	12.17	0.31	-0.14	0.340147	3.11	0.08	-0.09	0.120416	27.5	-0.17	27	0.03	27.5	-0.07	27.5	-0.14	27	-0.08	27.5	0.17	25.5	-0.16	26.5	-0.06	22.19	534	3.24	3.77	3.56	7.33	5.55	0.250113	200	41.73	43.24	1.51
59	22.89	562	3.25	3.81	3.55	7.36	5.585	0.243993	200	38.72	40.02	1.3	4	12.71	-0.17	0.13	0.214009	2.86	-0.11	-0.1	0.148661	28.5	-0.15	28	-0.19	29	-0.1	28.5	-0.07	27.5	0.14	29	0.02	26	0.11	27	0.02	22.9	580	3.35	3.93	3.52	7.45	5.69	0.248472	200	38.48	40.07	1.59
60	23.09	554	3.21	3.76	3.63	7.39	5.575	0.241447	200	39.88	40.15	0.27	113	12.58	0.63	0.36	0.725603	2.78	0.18	0.13	0.222036	27	-0.16	26	0.14	27.5	-0.14	27	-0.07	26.5	-0.14	27.5	-0.1	25	0.04	26	-0.18	23.17	570	3.38	3.95	3.48	7.43	5.69	0.245576	200	39.97	40.24	0.28
61	22.19	534	2.78	3.31	3.31	6.62	4.965	0.223749	200	43.27	45.87	2.6	88	11.21	-0.54	0.08	0.545894	3.37	-0.25	-0.01	0.2502	24.5	-0.05	24	-0.01	24	0.14	24.5	-0.07	24	0.16	23.5	0.07	23	0.19	24	0.07	22.22	543	2.84	3.38	3.26	6.64	5.01	0.225473	200	43.08	45.86	2.78
62	21.79	528	2.8	3.33	3.36	6.69	5.01	0.229922	200	42.64	46.8	4.17	87	11.42	0.35	-0.08	0.359026	3.18	0.25	-0.09	0.265707	26	-0.19	25.5	-0.09	25.5	0.04	26	-0.08	25.5	0.09	25	0.12	25	0.14	25.5	-0.05	21.76	541	2.84	3.38	3.28	6.66	5.02	0.230699	200	42.56	47.2	4.64
63	24.11	523	3.25	3.77	3.47	7.24	5.505	0.228328	200	44.09	44.81	0.72	111	11.64	-0.32	-0.13	0.345398	3.88	0.02	-0.01	0.0223607	18.5	-0.31	18	-0.11	18	-0.06	17.5	0.05	18	-0.11	17.5	0.1	18.5	0.02	18	0.04	24.12	537	3.26	3.79	3.46	7.25	5.52	0.228856	200	44.15	44.93	0.78
64	24.03	525	3.25	3.77	3.45	7.22	5.495	0.228672	200	44.32	45.42	1.1	86	11.74	0.2	0.27	0.336006	3.55	-0.06	0.05	0.0781025	18	-0.16	17.5	0.05	17.5	0.05	17.5	-0.16	17.5	0.04	17.5	-0.13	18.5	-0.13	18	-0.1	24.03	539	3.27	3.81	3.44	7.25	5.53	0.230129	200	44.32	45.37	1.05
65	22.6	482	2.79	3.27	3.82	7.09	5.18	0.229204	200	43.43	43.96	0.54	95	12.14	0.04	0.41	0.411947	3.78	-0.19	0.07	0.202485	24.5	-0.27	24	-0.18	24	-0.08	24	-0.03	24	-0.15	23.5	0	23	-0.01	23.5	0.08	22.57	494	2.97	3.47	3.62	7.09	5.28	0.233939	200	43.22	43.79	0.57
66	22.57	478	2.84	3.32	3.74	7.06	5.19	0.229951	200	43.6	44.37	0.77	76	11.9	0.35	-0.04	0.352278	3.41	0.13	0.09	0.158114	24	-0.11	23.5	0.01	23.5	0.07	23.5	0.12	23.5	0.02	23	0.17	23	-0.17	23.5	-0.07	22.58	489	3.01	3.5	3.61	7.11	5.305	0.234942	200	43.35	44.42	1.07
67	21.74	557	3.22	3.77	3.43	7.2	5.485	0.2523	200	41.78	44.77	2.99	96	12.7	-0.39	0.06	0.394588	4.78	-0.19	0.07	0.202485	28	-0.2	27.5	-0.1	28	-0.17	28	-0.14	27.5	-0.06	28.5	-0.14	26.5	0.03	27	-0.01	21.77	569	3.29	3.86	3.42	7.28	5.57	0.255857	200	41.72	44.88	3.16
68	22.1	544	3.22	3.77	3.45	7.22	5.495	0.248643	200	41.73	44.2	2.47	97	12.59	0.19	0.18	0.261725	4.23	0.11	-0.09	0.142127	27	-0.17	26.5	-0.08	27	-0.1	27	-0.14	26.5	-0.04	27	0.15	25	-0.06	26	0.04	22.1	560	3.28	3.84	3.43	7.27	5.555	0.251357	200	41.82	44.33	2.5
69	23.83	505	3.19	3.7	3.43	7.13	5.415	0.227235	200	43.47	44.57	1.1	95	12.22	-0.29	0.12	0.313847	3.9	-0.02	0.14	0.141421	20	-0.33	19.5	-0.12	19.5	-0.06	19	0.08	19.5	-0.16	19	0.04	19.5	0.09	19.5	-0.09	23.83	528	3.3	3.83	3.37	7.2	5.515	0.231431	200	43.42	44.24	0.82
70	21.44	505	3.27	3.77	3.39	7.16	5.465	0.254897	200	43.62	44.67	1.05	132	12.16	0.57	0.04	0.571402	3.49	0.16	-0.02	0.161245	28	-0.11	27.5	0.14	27.5	0.13	28	-0.08	27.5	0.01	28.5	-0.13	26.5	-0.02	27	0.12	21.46	519	3.35	3.88	3.35	7.23	5.555	0.258854	200	43.72	45.01	1.29
71	22.66	521	2.89	3.41	3.39	6.8	5.105	0.225287	200	44.19	44.78	0.59	87	11.47	-0.1	0.23	0.250799	3.69	0.02	0.1	0.10198	23	-0.05	22.5	0.03	22.5	0.09	22.5	0.12	22.5	0.08	22	0.09	22	0.09	22.5	0.05	22.65	538	2.88	3.42	3.39	6.81	5.115	0.225828	200	43.8	44.86	1.06
72	22.68	528	2.88	3.41	3.41	6.82	5.115	0.225529	200	43.97	45.03	1.07	98	11.43	0.5	0.05	0.502494	3.44	-0.06	0.14	0.152315	23	-0.11	22.5	-0.04	22.5	0.03	22.5	0.06	22.5	0.02	22	0.03	22	0.04	22.5	-0.01	22.69	542	2.89	3.43	3.4	6.83	5.13	0.226091	200	44.15	44.94	0.79
73	26.07	552	3.26	3.81	3.15	6.96	5.385	0.206559	200	41.52	42.75	1.23	96	12.26	-0.19	0.28	0.338378	3.98	0.03	0.32	0.321403	15	-0.09	15	-0.1	15.5	-0.13	14.5	0.11	14.5	0.06	14.5	0.12	15	0.16	14.5	0.09	26.07	572	3.27	3.84	3.14	6.98	5.41	0.207518	200	41.69	43.19	1.5
74	24.56	554	3.2	3.76	3.21	6.97	5.365	0.218445	200	41.47	43.06	1.59	78	12.16	0.43	0.21	0.478539	4.24	-0.01	0.17	0.170294	19.5	-0.1	19	0.08	19.5	0.07	19	0.1	19	0.11	19	0.01	19	-0.09	19	0.01	24.59	573	3.26	3.83	3.19	7.02	5.425	0.220618	200	41.37	43.12	1.76
75	23.53	523	3	3.53	3.31	6.84	5.185	0.220357	200	41.92	43.84	1.92	80	12.09	-0.17	0.48	0.509215	4.1	0	-0.04	0.04	22	-0.07	21.5	0.03	22	-0.03	21.5	0.16	21.5	0.09	21.5	-0.13	21.5	-0.07	21.5	0.01	23.55	536	2.98	3.52	3.31	6.83	5.175	0.219745	200	41.89	44.1	2.21
76	23.73	518	3	3.52	3.32	6.84	5.18	0.218289	200	42.06	43.72	1.66	97	11.83	0.19	0.19	0.268701	3.65	-0.06	-0.03	0.067082	21.5	-0.21	21	-0.13	21.5	-0.17	21	0.01	21	-0.03	20.5	0.06	21	-0.1	21	-0.09	23.78	534	2.99	3.52	3.32	6.84	5.18	0.21783	200	42.01	43.74	1.73
77	20.95	508	2.54	3.05	2.7	5.75	4.4	0.210024	200	44.05	47.03	2.98	78	10.72	-0.31	-0.05	0.314006	4.82	-0.21	-0.04	0.213776	28.5	-0.27	27.5	-0.05	27.5	0	28.5	-0.11	28	-0.05	26.5	-0.13	27.5	-0.01	27.5	0.13	20.95	520	2.59	3.11	2.73	5.84	4.475	0.213604	200	44.02	47.06	3.04
78	20.55	510	2.5	3.01	2.76	5.77	4.39	0.213625	200	44.04	46.84	2.81	99	10.67	0.22	0.04	0.223607	3.82	0.27	-0.19	0.330151	30	-0.04	29.5	-0.03	29	0.13	30	0.17	29.5	0.13	28	0.07	28.5	0.05	29.5	-0.13	20.64	525	2.53	3.06	2.93	5.99	4.525	0.219234	200	44.23	47.04	2.81
79	24.43	531	3.2	3.73	3.3	7.03	5.38	0.220221	200	42.81	43.45	0.64	89	12.15	-0.32	0	0.32	3.53	-0.09	-0.03	0.0948683	19	-0.22	18.5	-0.04	18.5	0.17	18.5	-0.11	18.5	-0.02	18	0.16	19	-0.08	18.5	-0.03	24.44	545	3.24	3.78	3.3	7.08	5.43	0.222177	200	42.57	43.34	0.76
80	24.61	526	3.18	3.7	3.27	6.97	5.335	0.216782	200	42.12	43.23	1.11	93	12.19	0.21	0.2	0.29	3.38	0.04	0.1	0.107703	19	-0.22	18.5	-0.04	19	-0.11	18.5	-0.06	18.5	0	18	0.17	18.5	-0.1	18.5	-0.07	24.64	543	3.2	3.74	3.26	7	5.37	0.217938	200	42.25	43.21	0.97
81	25.52	551	3.58	4.13	3.42	7.55	5.84	0.22884	200	43.31	46.24	2.92	95	11.77	-0.26	0.07	0.269258	3.32	-0.03	0.08	0.08544	13.5	-0.24	13	-0.01	13	0.14	12.5	0.03	13	0.05	13	0.09	14.5	-0.2	13	0.14	25.54	571	3.64	4.21	3.37	7.58	5.895	0.230814	200	43.32	46.31	2.99
82	25.22	565	3.55	4.12	3.38	7.5	5.81	0.230373	200	43.45	46.98	3.52	87	11.9	0.23	0.2	0.304795	3.22	0.05	0.21	0.21587	13.5	-0.01	13.5	-0.13	13.5	-0.01	13	-0.08	13.5	0.02	13.5	-0.06	14.5	0.09	13.5	0.1	25.25	581	3.56	4.14	3.38	7.52	5.83	0.230891	200	43.6	47.05	3.46
83	24.13	544	3.17	3.71	3.61	7.32	5.515	0.228554	200	42.84	43.57	0.73	71	12.19	-0.26	0.43	0.502494	3.36	-0.1	0.34	0.354401	20	-0.3	19.5	-0.07	19.5	0.06	19	0.16	19.5	-0.13	19.5	-0.15	19.5	0.07	19.5	-0.1	24.12	553	3.39	3.94	3.38	7.32	5.63	0.233416	200	42.71	43.36	0.64
84	24.26	544	3.25	3.79	3.5	7.29	5.54	0.228359	200	42.74	43.45	0.71	124	12.13	0.3	0.24	0.384187	3.36	0.05	0.3	0.304138	19.5	-0.13	19	0.09	19.5	-0.09	19	-0.02	19	0.04	19	0.05	19.5	-0.1	19	0.04	24.24	551	3.35	3.91	3.4	7.31	5.61	0.231436	200	42.71	43.41	0.7
85	24.07	533	3.09	3.63	3.22	6.85	5.24	0.217698	200	42.85	44.16	1.31	94	11.8	-0.54	0.05	0.54231	3.62	-0.17	0.04	0.174642	19.5	-0.09	19	0.02	19.5	-0.11	19	0.02	19	0.09	18.5	0.16	19.5	-0.02	19	0.14	24.09	546	3.09	3.63	3.24	6.87	5.25	0.217933	200	42.94	43.9	0.96
86	24.01	539	3.1	3.64	3.23	6.87	5.255	0.218867	200	43.06	44.73	1.67	90	11.8	0.24	0.24	0.339411	3.55	0.01	0.02	0.0223607	19.5	-0.28	19	-0.17	19	0.01	19.5	-0.28	19	-0.09	18.5	-0.05	19.5	-0.17	19	-0.01	24.04	553	3.1	3.65	3.21	6.86	5.255	0.218594	200	43.1	44.6	1.49
87	24.44	559	3.16	3.72	3.26	6.98	5.35	0.218903	200	43.84	44.71	0.87	88	11.21	-0.17	0	0.17	3.33	0.03	0.02	0.0360555	17.5	-0.23	17	-0.11	17	0.07	16.5	0.14	17	0.02	16.5	0.08	18	-0.12	17	0.12	24.46	570	3.22	3.79	3.22	7.01	5.4	0.220769	200	44.04	44.64	0.59
88	24.34	560	3.15	3.71	3.27	6.98	5.345	0.219597	200	44.2	44.75	0.55	111	11.25	0.14	0.11	0.178045	3.19	-0.1	-0.02	0.10198	17.5	-0.19	17	-0.06	17	0.08	16.5	0.16	17	0.05	16.5	0.1	18	-0.07	17.5	-0.15	24.35	577	3.17	3.75	3.24	6.99	5.37	0.220534	200	44.1	44.83	0.73
89	23.89	562	3.32	3.88	3.28	7.16	5.52	0.231059	200	42.58	43.52	0.94	80	12.38	-0.71	1.2	1.39431	3.78	-0.15	0.1	0.180278	21	-0.32	20.5	-0.08	20.5	0.08	20	0.16	20	0.16	20.5	-0.09	20.5	-0.14	20	0.15	23.89	577	3.35	3.93	3.25	7.18	5.555	0.232524	200	42.55	43.37	0.83
90	23.9	557	3.28	3.83	3.33	7.16	5.495	0.229916	200	42.07	42.87	0.81	85	12.43	0.42	0.7	0.816333	3.23	0.28	0.07	0.288617	21.5	-0.21	21	0.02	21.5	-0.09	21	-0.01	21	-0.07	21	0.05	21	-0.14	21	-0.14	23.91	572	3.31	3.88	3.3	7.18	5.53	0.231284	200	42	43.05	1.06
91	25.33	504	3.08	3.59	3.36	6.95	5.27	0.208054	200	43.24	45.24	2	83	11.43	-0.32	0.19	0.372156	3.37	0.12	0.11	0.162788	14.5	-0.14	14	0.06	14.5	-0.06	14	-0.07	14.5	-0.05	14	-0.13	15	0.15	14.5	-0.06	25.34	522	3.13	3.66	3.32	6.98	5.32	0.209945	200	43.31	44.82	1.5
92	25.27	513	3.07	3.59	3.34	6.93	5.26	0.208152	200	43.24	43.89	0.65	100	11.22	0.15	-0.2	0.25	3.77	0.02	0.04	0.0447214	15.5	-0.08	15	0.09	15.5	0.01	15	0.02	15.5	-0.04	15	-0.1	16	-0.07	15.5	-0.11	25.3	528	3.11	3.64	3.32	6.96	5.3	0.209486	200	43.24	44.46	1.22
93	25.52	574	3	3.58	3.38	6.96	5.27	0.206505	200	41.55	42.66	1.11	109	11.72	-0.23	0.53	0.577754	3.99	0.06	0.26	0.266833	17	-0.31	16.5	-0.1	17	-0.07	16.5	-0.08	16.5	-0.03	16	0.1	16.5	0.1	16.5	-0.15	25.5	590	3.02	3.61	3.36	6.97	5.29	0.207451	200	41.58	43.11	1.53
94	25.38	570	2.98	3.55	3.4	6.95	5.25	0.206856	200	41.3	42.67	1.37	88	11.92	0.52	0.22	0.564624	3.6	-0.09	0.06	0.108167	17.5	-0.27	17	-0.06	17.5	-0.02	17	-0.02	17	0.05	16.5	0.13	17	0.06	17	-0.13	25.42	589	2.97	3.56	3.39	6.95	5.255	0.206727	200	41.05	42.38	1.33
95	24.87	518	3.51	4.03	3.42	7.45	5.74	0.2308	200	42.85	43.5	0.65	94	11.92	-0.13	-0.14	0.19105	4	-0.02	-0.09	0.0921954	17.5	-0.14	17	0.1	17.5	-0.06	17	-0.08	17	0.08	17	0.17	17.5	-0.18	17	0.03	24.87	542	3.55	4.09	3.41	7.5	5.795	0.233012	200	42.97	43.4	0.43
96	24.86	513	3.5	4.01	3.43	7.44	5.725	0.23029	200	42.64	43.52	0.88	79	12.07	0.4	-0.07	0.406079	3.49	0.05	-0.1	0.111803	17.5	-0.04	17.5	-0.13	17.5	0.06	17	0.03	17.5	-0.15	17.5	-0.07	17.5	-0.08	17	0.12	24.86	534	3.48	4.02	3.42	7.44	5.73	0.230491	200	42.57	43.35	0.78
97	25.32	514	3.28	3.79	3.24	7.03	5.41	0.213665	200	44.66	44.75	0.09	40	11.48	-0.11	-0.16	0.194165	3.51	0.09	0.02	0.0921954	14	-0.22	13.5	0.01	14	-0.16	13	0.12	14	-0.12	13.5	-0.13	15	-0.2	14	-0.09	25.38	529	3.28	3.81	3.24	7.05	5.43	0.213948	200	44.42	44.69	0.27
98	25.16	520	3.23	3.75	3.25	7	5.375	0.213633	200	44.23	44.55	0.33	92	11.58	0.14	-0.13	0.19105	2.98	-0.07	0.03	0.0761577	15	-0.26	14.5	-0.04	14.5	0.13	14	0.11	14.5	0.12	14	0.15	15.5	-0.04	14.5	0.15	25.18	536	3.25	3.79	3.23	7.02	5.405	0.214654	200	44.1	44.54	0.44
99	21.01	537	3.04	3.58	3.43	7.01	5.295	0.252023	200	44.97	46.96	1.99	85	11.48	-0.3	0.3	0.424264	3.86	-0.16	0.13	0.206155	27.5	-0.04	27.5	-0.06	27	-0.08	27.5	0.03	27	0.12	27.5	-0.1	26	-0.05	27	0.01	21.02	554	3.07	3.62	3.41	7.03	5.325	0.25333	200	45.02	46.93	1.9
100	20.87	533	3.08	3.61	3.41	7.02	5.315	0.254672	200	45.2	47.45	2.25	93	11.5	0.17	0.33	0.371214	4.08	0.16	0.21	0.264008	28	-0.29	27.5	0.09	27	-0.01	27.5	0.15	27.5	-0.12	27.5	0.06	27	-0.03	27	0.14	20.86	550	3.11	3.66	3.42	7.08	5.37	0.25743	200	45.32	47.36	2.04
101	25.02	555	3.11	3.66	3.31	6.97	5.315	0.21243	200	41.13	42.65	1.52	85	12.46	-0.24	0.31	0.392046	3.21	0.04	0.06	0.072111	18.5	-0.09	18	0.14	18.5	0.14	18	0.14	18.5	-0.16	18	0	18	0.05	18	0	25.02	575	3.12	3.69	3.28	6.97	5.33	0.21303	200	41.08	42.51	1.43
102	25.34	556	3.13	3.69	3.29	6.98	5.335	0.210537	200	41.44	42.71	1.26	89	12.27	-0.03	0.18	0.182483	2.83	-0.06	-0.04	0.072111	17.5	-0.23	17	0	17.5	0	17	-0.02	17	0.08	17	-0.14	17	0.08	17	-0.11	25.36	580	3.17	3.75	3.27	7.02	5.385	0.212342	200	41.42	42.69	1.27
103	24.6	558	3.22	3.78	3.3	7.08	5.43	0.220732	200	42.59	43.36	0.76	58	11.48	-0.21	0.19	0.283196	3.89	-0.11	-0.03	0.114018	18.5	-0.11	18	0.03	18.5	-0.03	18	0.01	18	0.1	18	-0.02	18	0.1	18	0.06	24.61	574	3.21	3.79	3.27	7.06	5.425	0.220439	200	42.55	43.68	1.13
104	24.18	565	3.09	3.66	3.36	7.02	5.34	0.220844	200	42.63	43.46	0.82	81	11.46	0.28	0.26	0.382099	3.57	0.01	0	0.01	20	-0.27	19.5	-0.18	19.5	0.11	19.5	-0.14	19.5	-0.1	19	0.09	19.5	0.1	19.5	-0.08	24.2	579	3.11	3.69	3.34	7.03	5.36	0.221488	200	42.47	43.41	0.95
105	25.49	633	3.53	4.17	3.4	7.57	5.87	0.230286	200	42.13	42.57	0.44	78	12.29	-0.43	0	0.43	3.46	-0.31	0.08	0.320156	16.5	-0.06	16.5	-0.06	16.5	0.17	16	0.06	16	0.15	16.5	0.07	16.5	-0.03	16	0.04	25.53	644	3.62	4.26	3.37	7.63	5.945	0.232863	200	41.99	42.69	0.7
106	25.45	638	3.5	4.14	3.39	7.53	5.835	0.229273	200	41.64	42.62	0.98	79	12.21	0.41	0.03	0.411096	3.26	0.16	0.01	0.160312	17	-0.13	17	-0.15	17	0.12	16.5	0.02	16.5	0.1	17	0	17	-0.2	16.5	-0.04	25.5	648	3.58	4.23	3.39	7.62	5.925	0.232353	200	41.68	42.36	0.68
107	24.01	586	3.47	4.05	3.39	7.44	5.745	0.239275	200	42.76	43.83	1.07	81	12.43	0	0.2	0.2	3.59	0.02	-0.03	0.0360555	20	-0.11	20	-0.13	20	-0.04	19.5	0	19.5	0.05	20	-0.03	20	-0.16	19.5	0.07	23.97	601	3.44	4.04	3.36	7.4	5.72	0.238632	200	42.76	44.11	1.35
108	24.89	585	3.54	4.12	3.35	7.47	5.795	0.232824	200	43.01	44.04	1.04	89	12.45	0.05	0.35	0.353553	3.66	-0.04	-0.05	0.0640312	17	-0.15	16.5	0.13	17	-0.09	16.5	-0.13	16.5	0.07	17	-0.16	17	-0.08	16.5	0.05	24.9	606	3.53	4.14	3.33	7.47	5.805	0.233133	200	42.97	44.2	1.23
109	25.3	575	3.44	4.02	3.5	7.52	5.77	0.228063	200	41.5	42.51	1.02	81	12.54	-0.33	0.13	0.354683	3.19	-0.02	0.16	0.161245	17.5	-0.05	17.5	-0.07	18	-0.16	17	0.11	17.5	-0.14	17.5	0.02	17	0.19	17	0.01	25.3	596	3.5	4.1	3.48	7.58	5.84	0.23083	200	41.47	42.6	1.13
110	25.24	583	3.33	3.91	3.51	7.42	5.665	0.224445	200	41.34	42.47	1.13	98	12.59	0.04	0.24	0.243311	3.02	-0.04	0.17	0.174642	18	-0.19	17.5	0.12	18	0.04	17.5	-0.01	17.5	0.06	17.5	0.15	17.5	-0.02	17.5	-0.14	25.27	597	3.36	3.96	3.5	7.46	5.71	0.22596	200	41.37	42.47	1.11
111	25.05	566	3.16	3.72	3.45	7.17	5.445	0.217365	200	39.72	40.54	0.82	73	12.11	-0.22	0.62	0.657875	3.66	-0.27	0.21	0.342053	20.5	-0.1	20.5	-0.16	21	0.05	20.5	0.02	20.5	-0.17	20.5	-0.07	19.5	0.05	20	-0.14	25.05	566	3.16	3.72	3.45	7.17	5.445	0.217365	200	39.72	40.54	0.82
112	25.14	564	2.87	3.44	3.89	7.33	5.385	0.2142	200	39.5	40.35	0.84	102	11.98	1.05	0.1	1.05475	3.34	-0.02	0.02	0.0282843	20.5	-0.15	20	0.16	21	0.01	20.5	0.03	20.5	-0.17	20.5	-0.18	19.5	0.02	20	-0.16	25.14	564	2.87	3.44	3.89	7.33	5.385	0.2142	200	39.5	40.35	0.84
113	26.24	581	3.08	3.66	3.1	6.76	5.21	0.198552	200	40.58	41.2	0.62	73	11.84	-0.07	0.4	0.406079	3.77	0.05	0.2	0.206155	16	-0.03	16	-0.16	16.5	0.06	16	-0.02	15.5	0.08	15.5	0.12	16	-0.08	15.5	0.07	26.22	591	3.08	3.67	3.1	6.77	5.22	0.199085	200	40.68	41.07	0.39
114	26.2	579	3.05	3.63	3.1	6.73	5.18	0.19771	200	40.07	40.96	0.89	96	11.96	0.29	0.14	0.322025	3.97	0.12	0.12	0.169706	17	-0.35	16.5	-0.13	17	0.16	16.5	0.08	16	0.14	16	0.18	16.5	-0.13	16	0.09	26.25	595	3.06	3.65	3.12	6.77	5.21	0.198476	200	40.01	41.05	1.05
115	23.74	572	3.29	3.86	3.38	7.24	5.55	0.233783	200	42.72	43.56	0.84	91	11.95	-0.32	0.26	0.412311	3.93	-0.19	0.12	0.224722	21	-0.05	20.5	0.18	21	-0.01	20.5	0.1	20.5	0.09	21	-0.13	20.5	0.11	20.5	0.06	23.72	583	3.3	3.88	3.38	7.26	5.57	0.234823	200	42.61	43.94	1.34
116	23.91	573	3.24	3.82	3.38	7.2	5.51	0.230448	200	42.72	44.04	1.32	91	11.92	0.3	0.21	0.366197	3.53	0.15	0.05	0.158114	20.5	-0.3	20	-0.1	20	0.06	19.5	0.16	20	-0.15	20	-0.13	20	-0.01	20	-0.13	23.93	590	3.26	3.85	3.34	7.19	5.52	0.230673	200	42.66	43.36	0.7
117	20.97	539	3.27	3.81	3.28	7.09	5.45	0.259895	200	41.03	42.74	1.71	29	12.22	-0.4	0.11	0.414849	3.78	-0.2	-0.01	0.20025	32.5	-0.1	32.5	0.08	32.5	-0.02	32.5	0.06	32	-0.06	33.5	0.01	30.5	0.15	31	0.09	20.99	555	3.34	3.89	3.25	7.14	5.515	0.262744	200	40.83	42.72	1.89
118	25.24	536	3.34	3.87	3.46	7.33	5.6	0.22187	200	41.41	42.03	0.62	107	12.56	0.1	0.22	0.241661	3.81	-0.09	0	0.09	18	-0.03	18	-0.08	18.5	-0.13	17.5	0.17	18	-0.12	18	-0.08	17.5	0.12	17.5	0.01	25.24	522	3.56	4.11	3.17	7.28	5.695	0.225634	200	41.41	41.85	0.45
119	22.75	556	2.88	3.44	3.39	6.83	5.135	0.225714	200	42.5	43.77	1.26	87	12.49	-0.34	0.03	0.341321	3.69	-0.2	0.01	0.20025	24.5	-0.18	24	-0.12	24	0.12	24	0.08	24	-0.07	23.5	0.11	23	0.08	23.5	0.12	22.76	576	3.08	3.65	3.2	6.85	5.25	0.230668	200	42.48	43.6	1.12
120	22.94	556	2.84	3.4	3.41	6.81	5.105	0.222537	200	42.59	43.4	0.81	86	12.79	0.19	0.15	0.242074	3.27	0.17	0.02	0.171172	24	-0.17	23.5	-0.08	23.5	0.15	23.5	0.09	23.5	-0.05	23	0.07	23	-0.19	23	0.16	22.93	576	3.1	3.68	3.22	6.9	5.29	0.230702	200	42.49	43.62	1.13
121	22.11	583	2.62	3.21	3.43	6.64	4.925	0.22275	200	42.02	42.89	0.87	71	11.94	-0.4	0.49	0.632535	3.13	-0.3	0.12	0.32311	27.5	-0.17	26.5	0.06	27	0.16	27.5	-0.12	27	-0.05	26.5	0.03	25.5	-0.15	26.5	-0.02	22.24	600	2.79	3.39	3.27	6.66	5.025	0.225944	200	41.97	42.95	0.97
122	21.94	590	2.55	3.14	3.44	6.58	4.86	0.221513	200	41.95	43.69	1.73	97	11.81	0.63	0.05	0.631981	4.26	0.41	0.07	0.415933	27.5	-0.03	27	-0.16	27.5	-0.1	27.5	0.05	27	0.13	26.5	0.1	26.5	-0.05	26.5	0.17	21.94	610	2.71	3.32	3.28	6.6	4.96	0.226071	200	41.83	43.61	1.78
123	21.35	601	2.2	2.8	4.22	7.02	4.91	0.229977	200	42.33	44.02	1.69	92	11.72	-0.63	0.07	0.633877	3.45	-0.42	0.05	0.422966	29.5	-0.15	29.5	-0.11	29	-0.08	29.5	-0.03	29	-0.01	28.5	0.01	27.5	0.06	28.5	-0.03	21.33	620	2.65	3.27	3.69	6.96	5.115	0.239803	200	42.32	44.25	1.93
124	21.17	613	2.42	3.03	3.97	7	5.015	0.236892	200	42.17	44.19	2.01	83	11.74	0.29	-0.25	0.382884	4.07	0.53	-0.15	0.550818	30	-0.01	30	-0.03	29.5	0.13	30	0.14	29.5	0.13	29.5	0.05	28	0.02	29	0.08	21.18	636	2.68	3.31	3.69	7	5.155	0.24339	200	42.23	44.39	2.16
125	24.09	555	3.79	4.35	3.09	7.44	5.895	0.244707	200	44.29	46.73	2.44	90	12.64	-0.28	0.23	0.362353	3.32	-0.13	-0.02	0.131529	17	-0.12	17	-0.12	16.5	0.12	16	0.13	16.5	0.07	17	-0.09	17.5	0.12	17	0.01	24.14	580	3.81	4.39	3.08	7.47	5.93	0.24565	200	44.27	46.3	2.03
126	24.79	553	3.77	4.33	3.17	7.5	5.915	0.238604	200	44.11	46.12	2.01	84	12.65	0.22	0.19	0.290689	3.99	0.07	0.06	0.0921954	15.5	-0.29	15	-0.04	15	-0.04	14.5	-0.09	15	-0.07	15	0.01	15.5	0.19	15.5	0.07	24.8	574	3.92	4.5	3.04	7.54	6.02	0.242742	200	44.15	46.08	1.93
127	22.68	502	3.04	3.54	3.38	6.92	5.23	0.2306	200	45.02	47.13	2.11	83	11.64	-0.29	0.11	0.310161	3.35	-0.09	0.21	0.228473	21.5	-0.3	21	-0.15	20.5	-0.03	20.5	0.03	20.5	0.11	20	0.11	20.5	0.13	21	-0.07	22.67	522	3.1	3.62	3.31	6.93	5.275	0.232686	200	44.91	47.25	2.33
128	21.94	502	2.95	3.45	3.44	6.89	5.17	0.235643	200	44.76	47.22	2.46	92	11.76	0.59	0.15	0.608769	3.18	0.31	0.16	0.348855	24	-0.14	23	0.16	23	0.18	23.5	0.05	23.5	-0.01	23	0.05	23.5	0.07	23.5	0.03	21.92	520	3.06	3.58	3.32	6.9	5.24	0.239051	200	44.82	47.36	2.54
129	23.65	570	3.1	3.67	3.51	7.18	5.425	0.229387	200	43.29	44.4	1.11	89	12.25	-0.22	-0.02	0.220907	3.5	-0.03	0.14	0.143178	20.5	-0.11	20	0.12	20	0.17	20	-0.01	20	0.04	20	-0.05	20	0.17	20	0.07	23.66	583	3.13	3.72	3.49	7.21	5.465	0.230981	200	43.28	44.33	1.05
130	23.55	576	3.09	3.67	3.55	7.22	5.445	0.23121	200	43.55	44.71	1.16	96	12.43	0.26	0.14	0.295296	3.13	0.03	0.08	0.08544	20.5	-0.11	20	0.16	20	0.13	20	-0.02	20	0.03	20	-0.04	20	0.18	20	0.08	23.57	587	3.12	3.71	3.54	7.25	5.48	0.232499	200	43.37	44.77	1.41
131	26.14	552	3.31	3.86	3.29	7.15	5.505	0.210597	200	42.1	43.09	0.99	82	12.19	-0.27	0.16	0.313847	3.66	-0.16	0.16	0.226274	14.5	-0.32	14	0.08	14.5	-0.03	14	-0.13	14	-0.15	14	-0.03	14.5	0.1	14	-0.06	26.15	566	3.34	3.91	3.26	7.17	5.54	0.211855	200	42.04	43.32	1.28
132	26.2	552	3.32	3.87	3.3	7.17	5.52	0.210687	200	42.27	43.03	0.76	112	12.08	0.32	0.41	0.520096	3.41	0.14	0.16	0.212603	14	-0.16	14	-0.09	14	0.13	13.5	0.01	13.5	0	13.5	0.15	14.5	-0.07	13.5	0.1	26.19	570	3.36	3.93	3.28	7.21	5.57	0.212677	200	42.61	43.3	0.69
133	23.98	541	3.06	3.61	3.21	6.82	5.215	0.217473	200	43.94	45.08	1.14	87	11.85	-0.19	0.23	0.298329	3.72	0.01	0.06	0.0608276	18.5	-0.08	18	0.05	18	0.14	18	-0.05	18	0.11	17.5	0.08	19	-0.17	18.5	-0.08	24.02	557	3.11	3.67	3.16	6.83	5.25	0.218568	200	43.83	45.04	1.2
134	23.89	537	3.05	3.59	3.22	6.81	5.2	0.217664	200	44.03	45.4	1.37	88	11.81	0.33	0.14	0.358469	3.5	-0.22	0.01	0.220227	18.5	-0.04	18	0.09	18	0.16	18	-0.01	18	0.15	17.5	0.1	19	-0.12	18.5	-0.03	23.9	550	3.09	3.64	3.16	6.8	5.22	0.21841	200	43.95	45.39	1.45
135	26.05	500	3.2	3.7	3.26	6.96	5.33	0.204607	200	42.27	43.54	1.27	83	12.41	-0.1	0.14	0.172047	6.6	0.11	-0.26	0.282312	14	-0.1	14	-0.05	14	0.16	13.5	0.07	13.5	0.11	13.5	0.08	14.5	0.05	14	-0.14	26.09	511	3.21	3.72	3.24	6.96	5.34	0.204676	200	42.15	43.46	1.32
136	26.05	504	3.24	3.74	3.24	6.98	5.36	0.205758	200	42.58	44.01	1.43	105	12.43	0.08	0.27	0.281603	6.38	0.06	-0.14	0.152315	13.5	-0.11	13.5	-0.03	13.5	0.13	13	0.03	13	0.11	13	0.09	14	0.18	13.5	-0.1	26.03	520	3.23	3.75	3.25	7	5.375	0.206493	200	42.58	43.79	1.21
137	24.95	565	3.22	3.78	3.2	6.98	5.38	0.215631	200	41.59	42.33	0.75	95	12.23	-0.48	0.15	0.502892	6.35	0.03	-0.24	0.241868	19	-0.32	18.5	-0.12	19	-0.11	18.5	-0.11	18.5	-0.08	18	0.16	18	0.14	18	0.1	24.95	574	3.24	3.81	3.18	6.99	5.4	0.216433	200	41.59	42.15	0.55
138	24.9	564	3.19	3.76	3.2	6.96	5.36	0.215261	200	41.53	42.14	0.52	85	12.4	0.5	0.3	0.583095	6.27	-0.03	-0.28	0.281603	19	-0.12	18.5	0.09	19	0.1	18.5	0.1	18.5	0.11	18.5	-0.01	18.5	-0.08	18.5	-0.06	24.9	579	3.2	3.78	3.18	6.96	5.37	0.215663	200	41.44	42.39	0.95
139	24.39	502	3.62	4.12	3.28	7.4	5.76	0.236162	200	43.61	44.55	0.94	96	12.41	-0.12	0.12	0.169706	3.68	0.17	0.03	0.172627	18	-0.22	17.5	0.06	17.5	0.1	17	0.11	17.5	-0.04	17.5	0.08	18	0.13	17.5	0.04	24.38	517	3.63	4.15	3.26	7.41	5.78	0.23708	200	43.64	44.49	0.85
140	24.14	507	3.58	4.09	3.29	7.38	5.735	0.237572	200	43.42	45	1.59	86	12.56	0.11	0.03	0.114018	3.49	-0.12	0.03	0.123693	18.5	-0.13	18.5	-0.16	18.5	-0.17	18	-0.12	18	0.04	18.5	-0.17	18.5	0.14	18	0.16	24.15	521	3.61	4.14	3.27	7.41	5.775	0.23913	200	43.49	44.9	1.4
[truncated: 41 more columns]
